# Supplementary material
Source: PubMed Central journal article supplement (PMC6449217)
Supplement: NIHMS1518034-supplement-1.pdf [file NIHMS1518034-supplement-1.pdf]

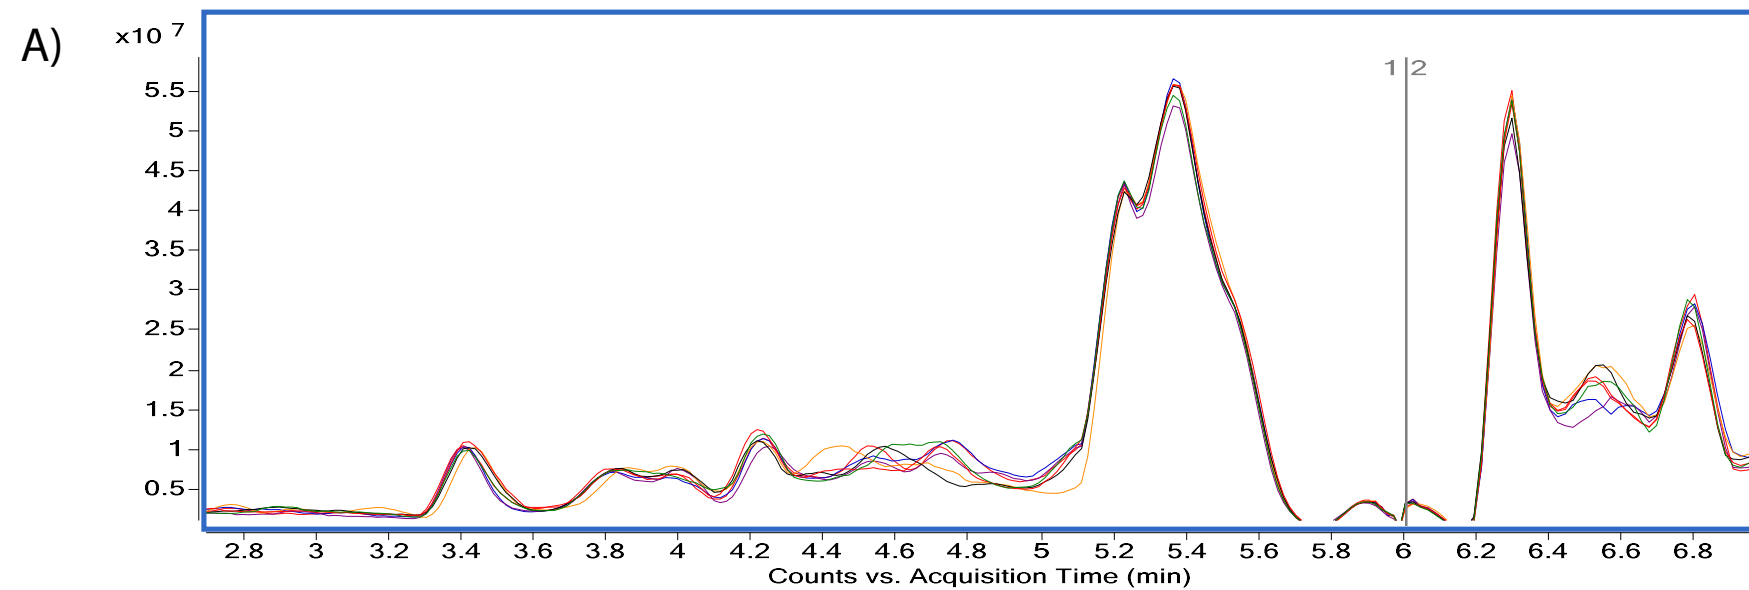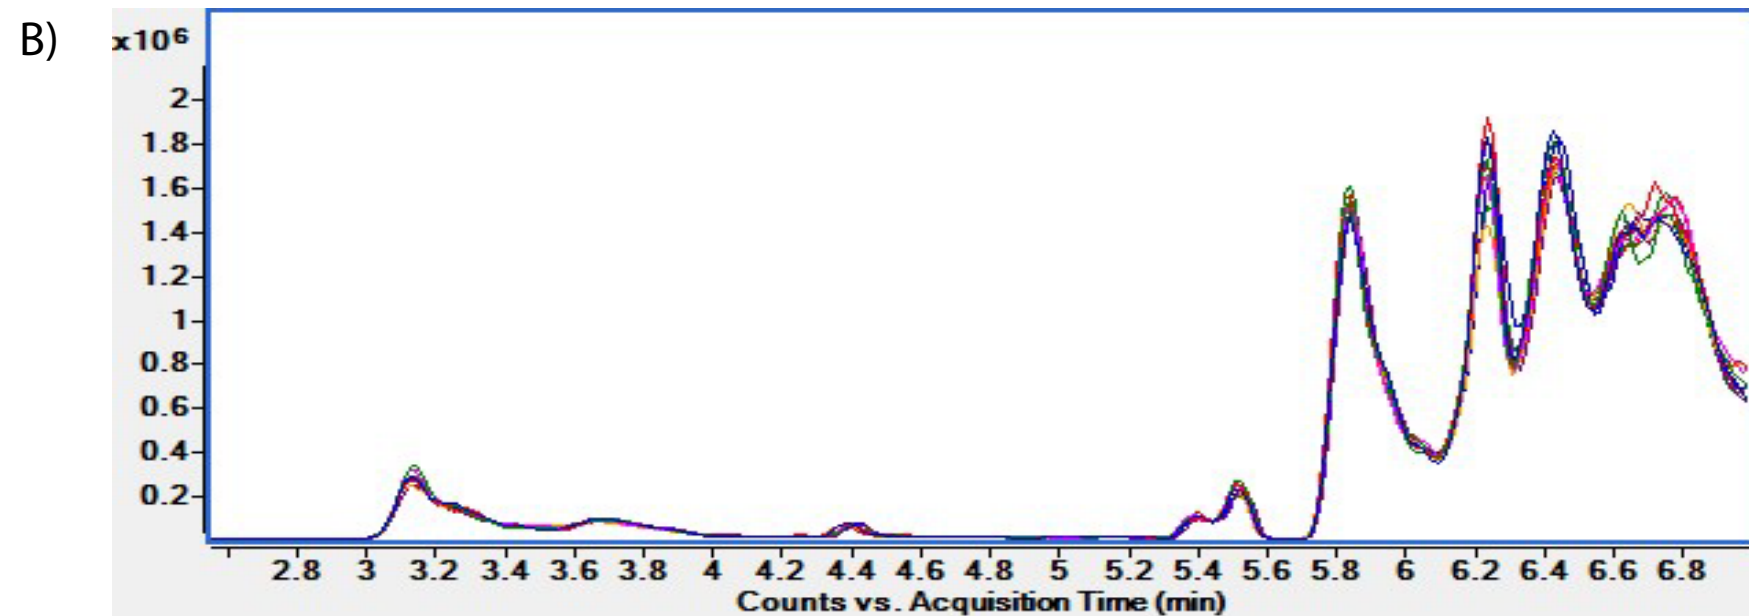

**Supplementary Figure 1.** Total ion chromatogram of pooled BLCA serum samples (A) ESI positive ionization mode (B) ESI negative ionization mode.
