# Supplementary material
Source: PubMed Central journal article supplement (PMC6449217)
Supplement: NIHMS1518034-supplement-4.pdf [file NIHMS1518034-supplement-4.pdf]

**AMT**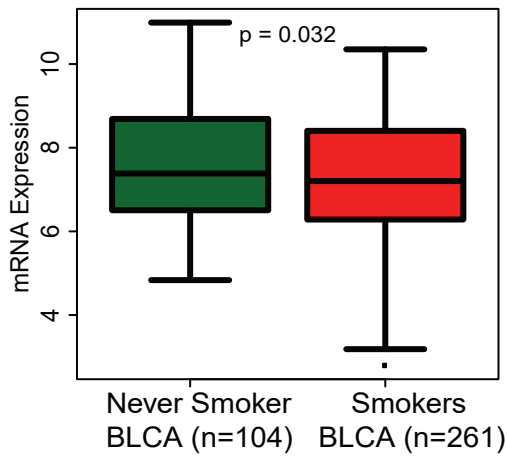**GOT2**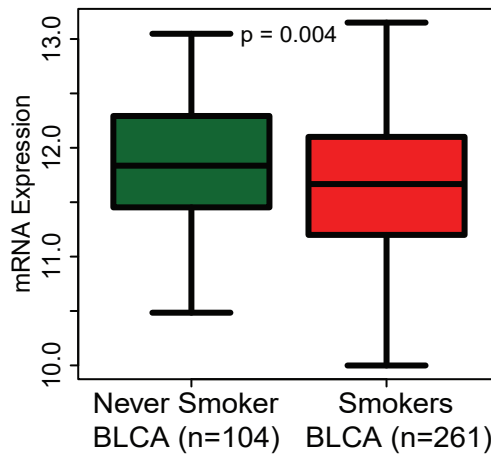**SLC14A1**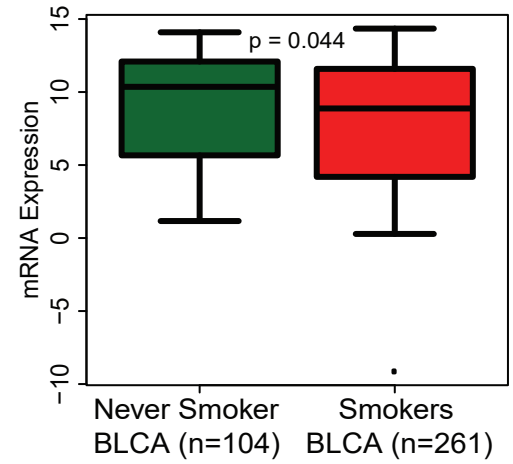**CMPK2**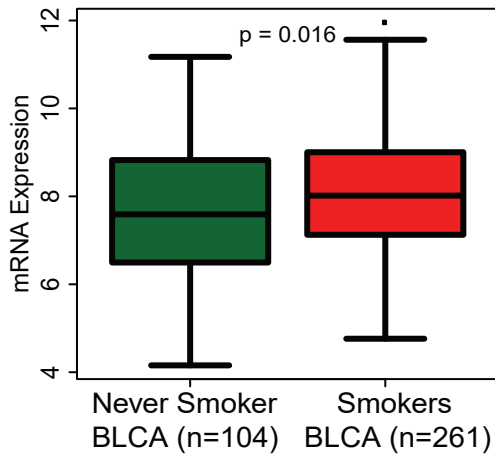**PARP9**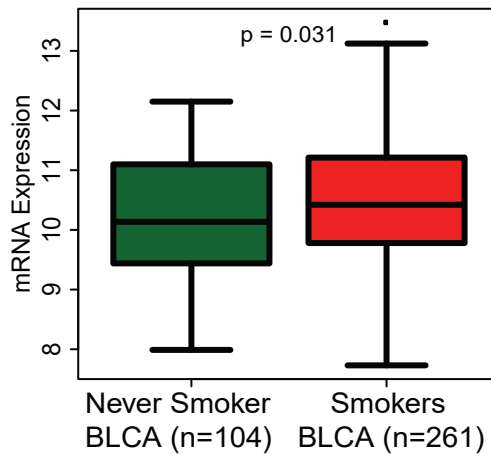**ST3GAL4**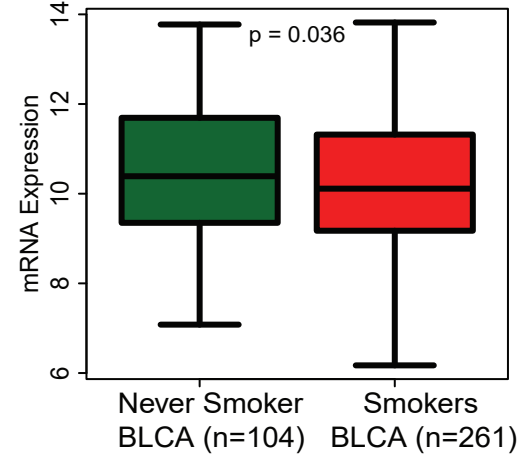**CSAD**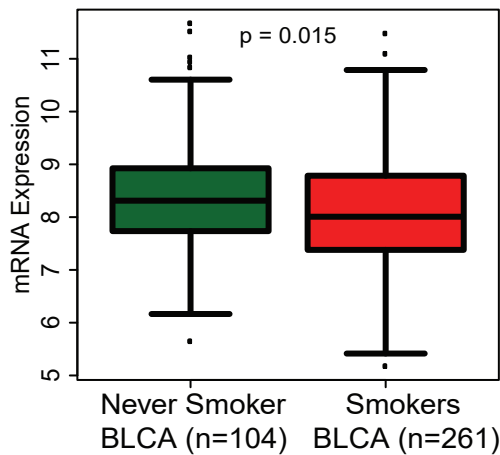**PLOD2**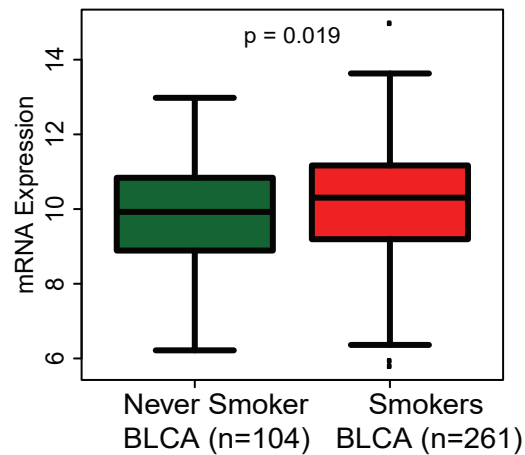

**Supplementary Figure 4.** Expression levels of intersecting genes. Box-plots representing expression levels of 8 genes that are significantly altered in the TCGA cohort in BLCA smokers compared to never smokers.
