# Supplementary material
Source: PubMed Central journal article supplement (PMC6449217)
Supplement: NIHMS1518034-supplement-5.pdf [file NIHMS1518034-supplement-5.pdf]

## Supplementary Table1-List of Metabolites targeted in the samples

| Compound Name                       | Precursor Ion | Product Ion | Polarity |
|-------------------------------------|---------------|-------------|----------|
| Urea                                | 61.0396       | 44          | Positive |
| Glycine                             | 76.0393       | 30.5        | Positive |
| 2-Aminobutyraldehyde                | 88.0757       | 70.1        | Positive |
| Pyruvate                            | 88.2          | 42.2        | Positive |
| Putrescine                          | 89.1073       | 72.1        | Positive |
| sarcosine                           | 90.055        | 44.1        | Positive |
| Alanine                             | 90.06         | 72.1        | Positive |
| Lactic acid                         | 91.04         | 73          | Positive |
| 2-Hydroxypyridine                   | 96.0444       | 51.1        | Positive |
| betaine aldehyde                    | 103.0992      | 58          | Positive |
| 4-aminobutyrate                     | 104.0706      | 69          | Positive |
| Aminobutyric acid                   | 104.0706      | 44.1        | Positive |
| Methyl alanine                      | 104.0706      | 58.1        | Positive |
| N, N Dimethyl Glycine               | 104.0706      | 58.1        | Positive |
| 4 Hydroxybutyric acid               | 105.0546      | 45          | Positive |
| Choline                             | 105.1148      | 60.1        | Positive |
| Serine                              | 106.0499      | 88.1        | Positive |
| Histamine                           | 112.0869      | 95.1        | Positive |
| Cytosine                            | 112.1         | 95.1        | Positive |
| Uracil                              | 113           | 72          | Positive |
| Creatinine                          | 114.0662      | 90          | Positive |
| Proline                             | 116.0706      | 70.1        | Positive |
| Guanidine acetic acid               | 118.0611      | 30.1        | Positive |
| Betaine                             | 118.0863      | 59.2        | Positive |
| Valine                              | 118.0863      | 55          | Positive |
| D-Erythronic acid $\gamma$ -lactone | 119.11        | 91.1        | Positive |
| Allo-Threonine                      | 120.0655      | 74.1        | Positive |
| Homoserine                          | 120.0655      | 74.1        | Positive |
| Theronine                           | 120.0655      | 56.1        | Positive |
| purine                              | 121.0509      | 94          | Positive |
| Cysteine                            | 122.027       | 59          | Positive |
| Nicotinamide                        | 123.0553      | 80.1        | Positive |
| Thymine                             | 127.0502      | 110         | Positive |
| 5-oxo-proline                       | 130.0499      | 84          | Positive |
| DL-Pipecolic acid                   | 130.0863      | 84          | Positive |
| 4-Methyl-2-oxo pentanoic acid       | 131.0703      | 43.06       | Positive |
| L-Thymine                           | 131.1         | 113.9       | Positive |
| N-Acetylputrescine                  | 131.1179      | 114         | Positive |
| Hydroxyglutaric acid                | 132           | 45          | Positive |
| N-acetylalanine                     | 132.0655      | 90.05       | Positive |
| Isoleucine                          | 132.1019      | 43.9        | Positive |
| Ethylmalonate/Methyl Malonate       | 133.0495      | 115.04      | Positive |
| Asparagine                          | 133.0608      | 87.1        | Positive |
| Gly-Gly                             | 133.0608      | 30          | Positive |
| Homocysteine                        | 136.05        | 90          | Positive |

|                           |          |        |          |
|---------------------------|----------|--------|----------|
| Adenine                   | 136.6    | 119    | Positive |
| Hypoxanthine              | 137      | 119    | Positive |
| Methyl Nicotinamide       | 138.08   | 95.1   | Positive |
| 4 AcetamidoBA             | 146.08   | 86.1   | Positive |
| 2-Aminoheptanoic acid     | 146.1176 | 100.1  | Positive |
| Acetylcholine             | 146.1176 | 43.02  | Positive |
| Deoxy carnitine           | 146.1176 | 60.1   | Positive |
| Spermidine                | 146.1652 | 112.1  | Positive |
| Methylglutaric acid       | 147.065  | 59.049 | Positive |
| Lysine                    | 147.1128 | 84.2   | Positive |
| Glutamic acid             | 148.0604 | 84     | Positive |
| Xanthine                  | 153.04   | 136    | Positive |
| Histidine                 | 156.0768 | 83     | Positive |
| 3-Indoleacetonitrile      | 157.08   | 130.1  | Positive |
| 2-Aminooctanoic acid      | 160.1332 | 55.3   | Positive |
| Carnitine                 | 162.1125 | 60.1   | Positive |
| 4-Coumarate               | 165.0446 | 119    | Positive |
| Phenyl alanine            | 166.0963 | 103.1  | Positive |
| Phenylalanine             | 166.0963 | 120.1  | Positive |
| 1-Methyl-Histidine        | 170.0924 | 124    | Positive |
| Glycerol 3-phosphate      | 173.02   | 132    | Positive |
| Gly-Pro                   | 173.0921 | 116.1  | Positive |
| Suberic acid              | 175.1    | 157.1  | Positive |
| N-Acetylorithine          | 175.1077 | 70.1   | Positive |
| Arginine                  | 175.119  | 60.2   | Positive |
| citrulline                | 176.103  | 159    | Positive |
| N-carbamoyl-L-aspartate   | 177.0506 | 74     | Positive |
| L-Arginine                | 177.1    | 159.1  | Positive |
| Glucosamine/Galactosamine | 180.0866 | 162    | Positive |
| Tyrosine                  | 182.0812 | 91     | Positive |
| Phospho Choline           | 185.0811 | 99     | Positive |
| 3-phospho-serine          | 186.0162 | 88     | Positive |
| N-acetyl-glutamine        | 189.087  | 130    | Positive |
| Gly-Leu                   | 189.1234 | 171    | Positive |
| N-Acetyl Lysine           | 189.1234 | 129    | Positive |
| N-Acetyl Methionine       | 192      | 104.1  | Positive |
| Quinic acid               | 193.0707 | 129.05 | Positive |
| Aminophosphovaleric acid  | 198.0625 | 86.1   | Positive |
| Dimethyl Arginine         | 203.1503 | 70.1   | Positive |
| Spermine                  | 203.23   | 112.1  | Positive |
| Acetyl Carnitine          | 204.123  | 85     | Positive |
| Tryptophan                | 205.1    | 188.1  | Positive |
| Kynurenine                | 209.0921 | 192    | Positive |
| Propeonyl Carnitine       | 218.1387 | 85     | Positive |
| Glutamyl alanine          | 219.1    | 84.1   | Positive |
| 1methyl tryptophan        | 219.1128 | 202.1  | Positive |
| Cystathionine             | 223.0747 | 134.1  | Positive |

|                                 |           |          |          |
|---------------------------------|-----------|----------|----------|
| 3-Hydroxykynurenine             | 225.087   | 162.1    | Positive |
| Myristoleic acid                | 227.2006  | 43.1     | Positive |
| Myristic acid                   | 229       | 38.9     | Positive |
| Pyroglu-Va                      | 229.1183  | 183.11   | Positive |
| Ergothioneine                   | 230.0958  | 186.1059 | Positive |
| Isobutyryl Carnitine            | 232.1543  | 173      | Positive |
| Cystine                         | 241.03    | 74.1     | Positive |
| Isovaleryl Carnitine            | 246.2     | 187.1    | Positive |
| MYRISTATE (14:0)+Na             | 250       | 173      | Positive |
| Palmitic acid                   | 257       | 57       | Positive |
| acadesine                       | 259.1037  | 110      | Positive |
| D-glucosamine-1-phosphate       | 260.053   | 162.1    | Positive |
| Heptanoyl Carnitine             | 260.2     | 201.2    | Positive |
| Glu-Leu                         | 261.1445  | 187      | Positive |
| thiamine                        | 266.1196  | 122      | Positive |
| S-ribosyl-L-homocysteine_pos    | 268.0849  | 88       | Positive |
| Glu-Glu                         | 277.103   | 148.06   | Positive |
| ASP-PH                          | 281.1132  | 166.1    | Positive |
| Methyl Adenosine                | 282.1     | 150      | Positive |
| Oleic acid                      | 283.27    | 89.2     | Positive |
| Guanosine                       | 284.0989  | 135      | Positive |
| Octonyl Carnitine               | 288.2     | 85       | Positive |
| L-arginino-succinate            | 291.1299  | 70       | Positive |
| Aspartame                       | 295.1288  | 180.1    | Positive |
| Phe-Glu                         | 295.12889 | 120.08   | Positive |
| 10-NONADECENOATE (19:1N9)       | 297.2788  | 281.4    | Positive |
| 7-methylguanosine               | 299.1224  | 166      | Positive |
| N-acetyl Glucosamine 6 Phos     | 302.0635  | 284.1    | Positive |
| NAAG                            | 305.0979  | 148.2    | Positive |
| dCMP                            | 308.0642  | 112      | Positive |
| Glutathione, Reduced (GSH)      | 308.0911  | 76       | Positive |
| N-Acetylneuraminic acid         | 310.1     | 274.1    | Positive |
| Glu-Tyr                         | 311.1238  | 247.1    | Positive |
| Hydroxy Stearic acid Methy este | 315.3     | 97.1     | Positive |
| Cytidine 5 -Monophosphate (5-C  | 324.0591  | 112      | Positive |
| UMP                             | 325.0431  | 113.03   | Positive |
| 1,5-ANHYDROGLUCITOL (1,5-AG     | 329       | 165      | Positive |
| cyclic AMP                      | 330.06    | 136      | Positive |
| Nicotinamide ribotide           | 335       | 123      | Positive |
| aminoimidazole carboxamide rib  | 339.07    | 110      | Positive |
| AMP                             | 348.0704  | 136      | Positive |
| dGMP                            | 348.0704  | 135      | Positive |
| GMP                             | 364.0653  | 152      | Positive |
| 3.alpha.-Mannobiose             | 343.1217  | 343.1217 | Positive |
| 1-Methylnicotinamide cation     | 138.0556  | 138.0556 | Positive |
| .beta.-D-Glucose                | 198.097   | 198.097  | Positive |
| L-Cystine                       | 241.0314  | 241.0314 | Positive |

|                                              |          |          |          |
|----------------------------------------------|----------|----------|----------|
| L-Sorbose                                    | 163.06   | 163.06   | Positive |
| Docosaheptaenoic acid ethyl ester            | 357.2779 | 357.2779 | Positive |
| Lactose                                      | 343.1229 | 343.1229 | Positive |
| 14(15)-EpETE                                 | 301.1427 | 301.1427 | Positive |
| Chenodeoxycholic acid                        | 357.2771 | 357.2771 | Positive |
| 3,4,5-Trimethoxycinnamic acid                | 239.1585 | 239.1585 | Positive |
| 6-Keto Testosterone Enanthate                | 285.204  | 285.204  | Positive |
| Arachidonoyl amide                           | 305.1565 | 305.1565 | Positive |
| Isomyristic acid                             | 229.2158 | 229.2158 | Positive |
| Zearalenone                                  | 302.1225 | 302.1225 | Positive |
| 6-Ketoprostaglandin E1                       | 351.1009 | 351.1009 | Positive |
| N-Nervonoyltaurine                           | 110.0095 | 110.0095 | Positive |
| Lithocholic acid                             | 358.2065 | 358.2065 | Positive |
| Pentadecanoic acid, 14-methyl-               | 257.2473 | 257.2473 | Positive |
| Idebenone                                    | 261.1294 | 261.1294 | Positive |
| 15(S)-15-Methylprostaglandin E1              | 314.9497 | 314.9497 | Positive |
| Difloxacin                                   | 382.9303 | 382.9303 | Positive |
| Sedoheptulosan                               | 191.0169 | 191.0169 | Positive |
| 2-Chloro-L-phenylalanine                     | 200.0408 | 200.0408 | Positive |
| 2',3,4,5,6'-Pentamethoxychalcone             | 341.092  | 341.092  | Positive |
| D-myo-Inositol-1-phosphate                   | 261.0381 | 261.0381 | Positive |
| Dihydrocodeine                               | 302.023  | 302.023  | Positive |
| 3-Hydroxy-3-methylglutaric acid              | 160.0774 | 160.0774 | Positive |
| 11-Dehydrothromboxane B2                     | 351.0993 | 351.0993 | Positive |
| Trifluoroacetic acid                         | 115.0384 | 115.0384 | Positive |
| Hydroxyflutamide                             | 276.1431 | 276.1431 | Positive |
| 2-(14,15-Epoxyeicosatrienoyl)glycerol        | 303.0764 | 303.0764 | Positive |
| Bis(2-ethylhexyl) phthalate                  | 390.9789 | 390.9789 | Positive |
| Resorcinol sulfoxide                         | 246.2101 | 246.2101 | Positive |
| 4,6-Dimethyl-3,7-di(4-methoxyphenyl)pyridine | 454.0327 | 454.0327 | Positive |
| 3,4'-Dihydroxyflavone                        | 255.1945 | 255.1945 | Positive |
| Nadolol                                      | 310.1463 | 310.1463 | Positive |
| 15-HETE                                      | 303.0855 | 303.0855 | Positive |
| 3-Ethoxy-1-propanol                          | 126.5279 | 126.5279 | Positive |
| 17-Phenoxyprostaglandin F2.alpha.            | 351.1012 | 351.1012 | Positive |
| 3-Cyclopentyl-1-propanol                     | 110.0103 | 110.0103 | Positive |
| Prothioconazole                              | 327.2001 | 327.2001 | Positive |
| 7-Methoxyloxapine                            | 357.956  | 357.956  | Positive |
| Butorphanol                                  | 310.1445 | 310.1445 | Positive |
| 1-Oleoyl-L-.alpha.-lysophosphatidylcholine   | 110.0103 | 110.0103 | Positive |
| 3-Hydroxy-3-methylglutaryl-CoA               | 912.2    | 428      | Positive |
| 1,3-diphosphatidylglycerate                  | 265      | 79       | Positive |
| 2,3-dihydroxybenzoic acid                    | 153      | 109      | Positive |
| 3PG and 2PG                                  | 184.9    | 97       | Positive |
| 3-phosphoglycerate                           | 185      | 97       | Positive |
| 6-phospho-D-gluconate                        | 275      | 97       | Positive |
| acetylphosphate                              | 139      | 79       | Positive |

|                               |         |        |          |
|-------------------------------|---------|--------|----------|
| ADP_neg                       | 426.1   | 159    | Positive |
| allantoin                     | 157.05  | 114    | Positive |
| anthranilate                  | 136     | 92     | Positive |
| cholesteryl sulfate           | 465.2   | 97     | Positive |
| Cholesterol                   | 385.3   | 217.7  | Positive |
| dGDP_neg                      | 426.12  | 159    | Positive |
| dihydroorotate                | 157     | 113    | Positive |
| D-sedoheptulose-1-7-phosphate | 289     | 97     | Positive |
| Farnesyl-PP                   | 381     | 78.7   | Positive |
| FBP/GBP                       | 338.9   | 96.8   | Positive |
| Fructose-6-Phosphate          | 259     | 97.1   | Positive |
| Fumaric acid                  | 115     | 71.1   | Positive |
| Glucose-6-Phosphate           | 259     | 97     | Positive |
| Glucuronic acid               | 193     | 113    | Positive |
| Glutamine                     | 145     | 109    | Positive |
| glycolate                     | 75      | 45.2   | Positive |
| HBA                           | 103     | 59.1   | Positive |
| hexose-phosphate              | 259     | 79     | Positive |
| Hydroxyisocaproic acid        | 131.006 | 85.1   | Positive |
| inosine                       | 267     | 135    | Positive |
| Ketoglutarate                 | 145     | 101.1  | Positive |
| lactate                       | 89      | 43.2   | Positive |
| L-Anthranilic acid            | 137     | 93     | Positive |
| L-Gibberilic acid             | 345     | 143    | Positive |
| L-Jasmonic acid               | 209     | 126.9  | Positive |
| L-Threonic acid               | 135     | 75.1   | Positive |
| Malic acid                    | 133     | 115.1  | Positive |
| Malonate (Propanedioate)      | 103.1   | 59.1   | Positive |
| Maltose                       | 341.1   | 161    | Positive |
| MALTOTETRAOSE                 | 665.2   | 161.1  | Positive |
| NAD+_neg                      | 662     | 540    | Positive |
| N-Aetyl Aspartic acid         | 174     | 88.1   | Positive |
| Octanoic acid                 | 143.1   | 125.1  | Positive |
| octulose-monophosphate (O8P-  | 319     | 97     | Positive |
| p-aminobenzoate               | 136.05  | 92     | Positive |
| PEP                           | 167     | 79     | Positive |
| Ribose-5-phosphate            | 229.01  | 138.98 | Positive |
| shikimate                     | 173     | 93     | Positive |
| S-ribosyl-L-homocysteine_neg  | 266     | 134    | Positive |
| Stearic acid                  | 283.48  | 265.2  | Positive |
| succinate                     | 117     | 73     | Positive |
| Succinic acid                 | 117     | 99.9   | Positive |
| taurine                       | 124     | 80     | Positive |
| trehalose-6-Phosphate         | 421     | 79     | Positive |
| UDP-D-glucose                 | 565     | 323    | Positive |
| UDP-D-glucuronate             | 579     | 403    | Positive |
| UDP-N-acetyl-glucosamine      | 606     | 385    | Positive |

|                                 |          |        |          |
|---------------------------------|----------|--------|----------|
| Uric acid                       | 167.001  | 124    | Positive |
| uridine                         | 243      | 200    | Positive |
| Sarcosine/Alanine               | 90.04    | 44.1   | Positive |
| N, N Dimethyl Glycine/Methyl al | 104.1    | 58.1   | Positive |
| 5-Hydroxyindolacetic acid       | 192.0655 | 146    | Positive |
| 2-Methylbutyrylcarnitine        | 246      | 187    | Positive |
| 2 Methyl glutamic acid          | 162.1    | 116.1  | Positive |
| Hydroxy kynurinine              | 225.1    | 162.1  | Positive |
| Erythrono-1,4-lactone           | 119.11   | 91.1   | Positive |
| Acetyl Methionine               | 192.1    | 61     | Positive |
| Amino phosphovelureic acid      | 198.1    | 135    | Positive |
| Lauric acid                     | 201.2    | 114.8  | Positive |
| Ethyl 3 Indoleacetate           | 204.1    | 130    | Positive |
| Carnitine, butyl ester          | 218      | 103    | Positive |
| Citrate                         | 191.05   | 111    | Negative |
| D-glyceraldehyde-3-phosphate    | 169.05   | 97     | Negative |
| GlucoseFructose                 | 179      | 59     | Negative |
| Hydroxy glutarate               | 147      | 129.1  | Negative |
| Methylmalonic acid              | 117.002  | 73.1   | Negative |
| orotate                         | 155      | 111    | Negative |
| Ribose                          | 149      | 65     | Negative |
| dihydroxy-acetone-phosphate     | 169      | 79     | Negative |
| Glycerol 3 Phosphate            | 171      | 97     | Negative |
| sn-glycerol-3-phosphate         | 171      | 79     | Negative |
| aconitate                       | 173.05   | 85     | Negative |
| allantoate                      | 175      | 132    | Negative |
| Ascorbic acid                   | 175.001  | 87     | Negative |
| 2-Isopropylmalic acid           | 175.002  | 115    | Negative |
| N-carbamoyl-L-aspartate_neg     | 175.03   | 132    | Negative |
| Pyrophosphate                   | 176.8    | 158.6  | Negative |
| glucono-D-lactone               | 177      | 129    | Negative |
| myo-inositol                    | 179      | 161    | Negative |
| hydroxyphenylpyruvate           | 179.05   | 107    | Negative |
| Indoleacrylic acid              | 186      | 142.03 | Negative |
| Kynurenic acid                  | 188      | 144    | Negative |
| citrate-isocitrate              | 191      | 111    | Negative |
| 2-dehydro-D-gluconate           | 193      | 103    | Negative |
| D-gluconate                     | 195      | 129    | Negative |
| D-erythrose-4-phosphate         | 199      | 97     | Negative |
| Xanthurenic acid                | 204.001  | 160    | Negative |
| lipoate                         | 205      | 171    | Negative |
| L-Tryptophan                    | 205      | 117    | Negative |
| D-glucarate                     | 209      | 85     | Negative |
| deoxyribose-phosphate           | 213      | 79     | Negative |
| L-Zeatine                       | 218      | 173    | Negative |
| pantothenate                    | 218      | 146    | Negative |
| prephenate                      | 225      | 91     | Negative |

|                                    |          |          |          |
|------------------------------------|----------|----------|----------|
| deoxyuridine                       | 227      | 184      | Negative |
| ribose-phosphate                   | 229      | 79       | Negative |
| trans, trans-farnesyl diphosphate  | 381      | 79       | Negative |
| Indoxyl sulfate                    | 212.0008 | 212.0008 | Negative |
| 1,2-Diethylhydrazine               | 89.0262  | 89.0262  | Negative |
| D-Fructose 6-phosphate             | 303.9778 | 303.9778 | Negative |
| 4-Nitroquinoline-1-oxide           | 89.0261  | 89.0261  | Negative |
| Glucoheptonic acid                 | 129.0555 | 129.0555 | Negative |
| cis-Vaccenic acid                  | 299.9848 | 299.9848 | Negative |
| 2-Butenedioic acid, 2-methyl-, (E) | 113.0246 | 113.0246 | Negative |
| 8-Chlorotheophylline               | 129.0552 | 129.0552 | Negative |
| 6,7-Dimethyltetrahydropterin       | 197.0682 | 197.0682 | Negative |
| Flurandrenolide                    | 436.4848 | 436.4848 | Negative |
| Mevalonic acid                     | 153.0204 | 153.0204 | Negative |
| 3-Cyano-7-ethoxycoumarin           | 215.0319 | 215.0319 | Negative |
| 4-Nitro-1,3-benzenediamine         | 154.0614 | 154.0614 | Negative |
| 7,8,4'-Trihydroxyflavone           | 215.0318 | 215.0318 | Negative |
| 6-Methyluracil                     | 127.0507 | 127.0507 | Negative |
| Unoprostone                        | 328.4812 | 328.4812 | Negative |
| DL-Homocysteine, S-ethyl-          | 148.043  | 148.043  | Negative |
| N-(4-Nitro-2-phenoxyphenyl)me      | 308.132  | 308.132  | Negative |
| Vinburnine                         | 296.1004 | 296.1004 | Negative |
| Hydroquinine                       | 308.0965 | 308.0965 | Negative |
| Ursodeoxycholic acid               | 356.9842 | 356.9842 | Negative |
| 4-Hydroxypropranolol               | 277.1786 | 277.1786 | Negative |
| 1,3-Dihydrobenzimidazol-2-one      | 135.0304 | 135.0304 | Negative |
| Dodecyl sulfate                    | 265.1475 | 265.1475 | Negative |
| Isobutyric acid                    | 89.0263  | 89.0263  | Negative |
| 5-Sulfosalicylic acid              | 172.9908 | 172.9908 | Negative |
| 4,6-Dihydroxypyrimidine            | 129.0562 | 129.0562 | Negative |
| 5-Methylcytosine                   | 127.0501 | 127.0501 | Negative |
| Monoarachidin                      | 369.1705 | 369.1705 | Negative |
| 3-Cyano-4-ethyl-6-methylcouma      | 215.0329 | 215.0329 | Negative |
| D-Glucosaminic acid                | 114.0553 | 114.0553 | Negative |
| Triamcinolone                      | 339.1941 | 339.1941 | Negative |
| Lomefloxacin                       | 352.9856 | 352.9856 | Negative |
| 2-Acetoxy palmitic acid, 2-(N,N,N  | 401.1295 | 401.1295 | Negative |
| 5,4'-Dihydroxyflavone              | 255.2334 | 255.2334 | Negative |
| 2,4-O-Ethylidene-D-erythrose       | 129.0553 | 129.0553 | Negative |
| Tetrapropylammonium cation         | 114.0559 | 114.0559 | Negative |
| 2',5'-Dimethoxy-6-fluoroflavone    | 301.9836 | 301.9836 | Negative |
| Thymidine 5'-monophosphate         | 277.033  | 277.033  | Negative |
| Acenocoumarol                      | 354.9852 | 354.9852 | Negative |
| Lactacystin                        | 358.9781 | 358.9781 | Negative |
| 5-Azacytosine                      | 114.0557 | 114.0557 | Negative |
| 2,3-Dinor fluprostenol             | 179.0555 | 179.0555 | Negative |
| 2-Aminoethylphosphonic acid        | 127.0504 | 127.0504 | Negative |

|                                 |          |          |          |
|---------------------------------|----------|----------|----------|
| Glycan Man1F                    | 330.4792 | 330.4792 | Negative |
| 14,15-Epoxy-5Z,8Z,11Z-eicosatri | 301.9805 | 301.9805 | Negative |
| Sulfaguanidine                  | 215.0312 | 215.0312 | Negative |
| Thioguanine                     | 168.0762 | 168.0762 | Negative |
| Eseroline                       | 220.1193 | 220.1193 | Negative |
| Carbetapentane                  | 217.0287 | 217.0287 | Negative |
| Hexadecylmethylglycerol         | 89.0238  | 89.0238  | Negative |
| 13,14-Dihydro-15(R)-prostagland | 354.9842 | 354.9842 | Negative |
| Tetrahydropalmatine             | 354.9821 | 354.9821 | Negative |
| 2-Phosphonobutyric acid         | 335.0464 | 335.0464 | Negative |
| Chlorsulfuron                   | 358.9783 | 358.9783 | Negative |
| 2-Methylvaleric acid            | 89.0258  | 89.0258  | Negative |
| 5(S)-HETE                       | 301.9808 | 301.9808 | Negative |
| DL-3,4-Dihydroxyphenyl glycol   | 168.0759 | 168.0759 | Negative |

**Supplementary Table 1.** List of metabolites with MRM transitions in ESI positive and negative ionization modes.
