# Supplementary material
Source: PubMed Central journal article supplement (PMC6449217)
Supplement: NIHMS1518034-supplement-6.pdf [file NIHMS1518034-supplement-6.pdf]

## Supplementary Table 2

### List of integrated 17 genes from TCGA

| Genes   | Fold Change | P-Value |
|---------|-------------|---------|
| ST3GAL4 | 0.744420357 | 0.036   |
| CMPK2   | 1.357125051 | 0.016   |
| PLOD2   | 1.428731276 | 0.019   |
| SLC14A1 | 0.692321483 | 0.044   |
| AMT     | 0.732308096 | 0.032   |
| GOT2    | 0.888351149 | 0.004   |
| IYD     | 0.507633616 | 0.003   |
| TTL     | 1.131532087 | 0.047   |
| CSAD    | 0.777975392 | 0.015   |
| COMT    | 0.839968338 | 0.028   |
| PARP9   | 1.218382804 | 0.031   |
| AASS    | 0.805627647 | 0.209   |
| CPT1B   | 0.781285272 | 0.185   |
| SLC22A5 | 0.817522531 | 0.205   |
| CHDH    | 0.640321782 | 0.056   |
| SHMT2   | 0.886758687 | 0.054   |
| PARP14  | 1.185224578 | 0.095   |

**Supplementary Table 2.** List of genes obtained from integration of metabolic and transcriptomics gene signatures with their corresponding fold changes. The significantly altered genes were highlighted.
