# Supplementary material
Source: PubMed Central journal article supplement (PMC6449217)

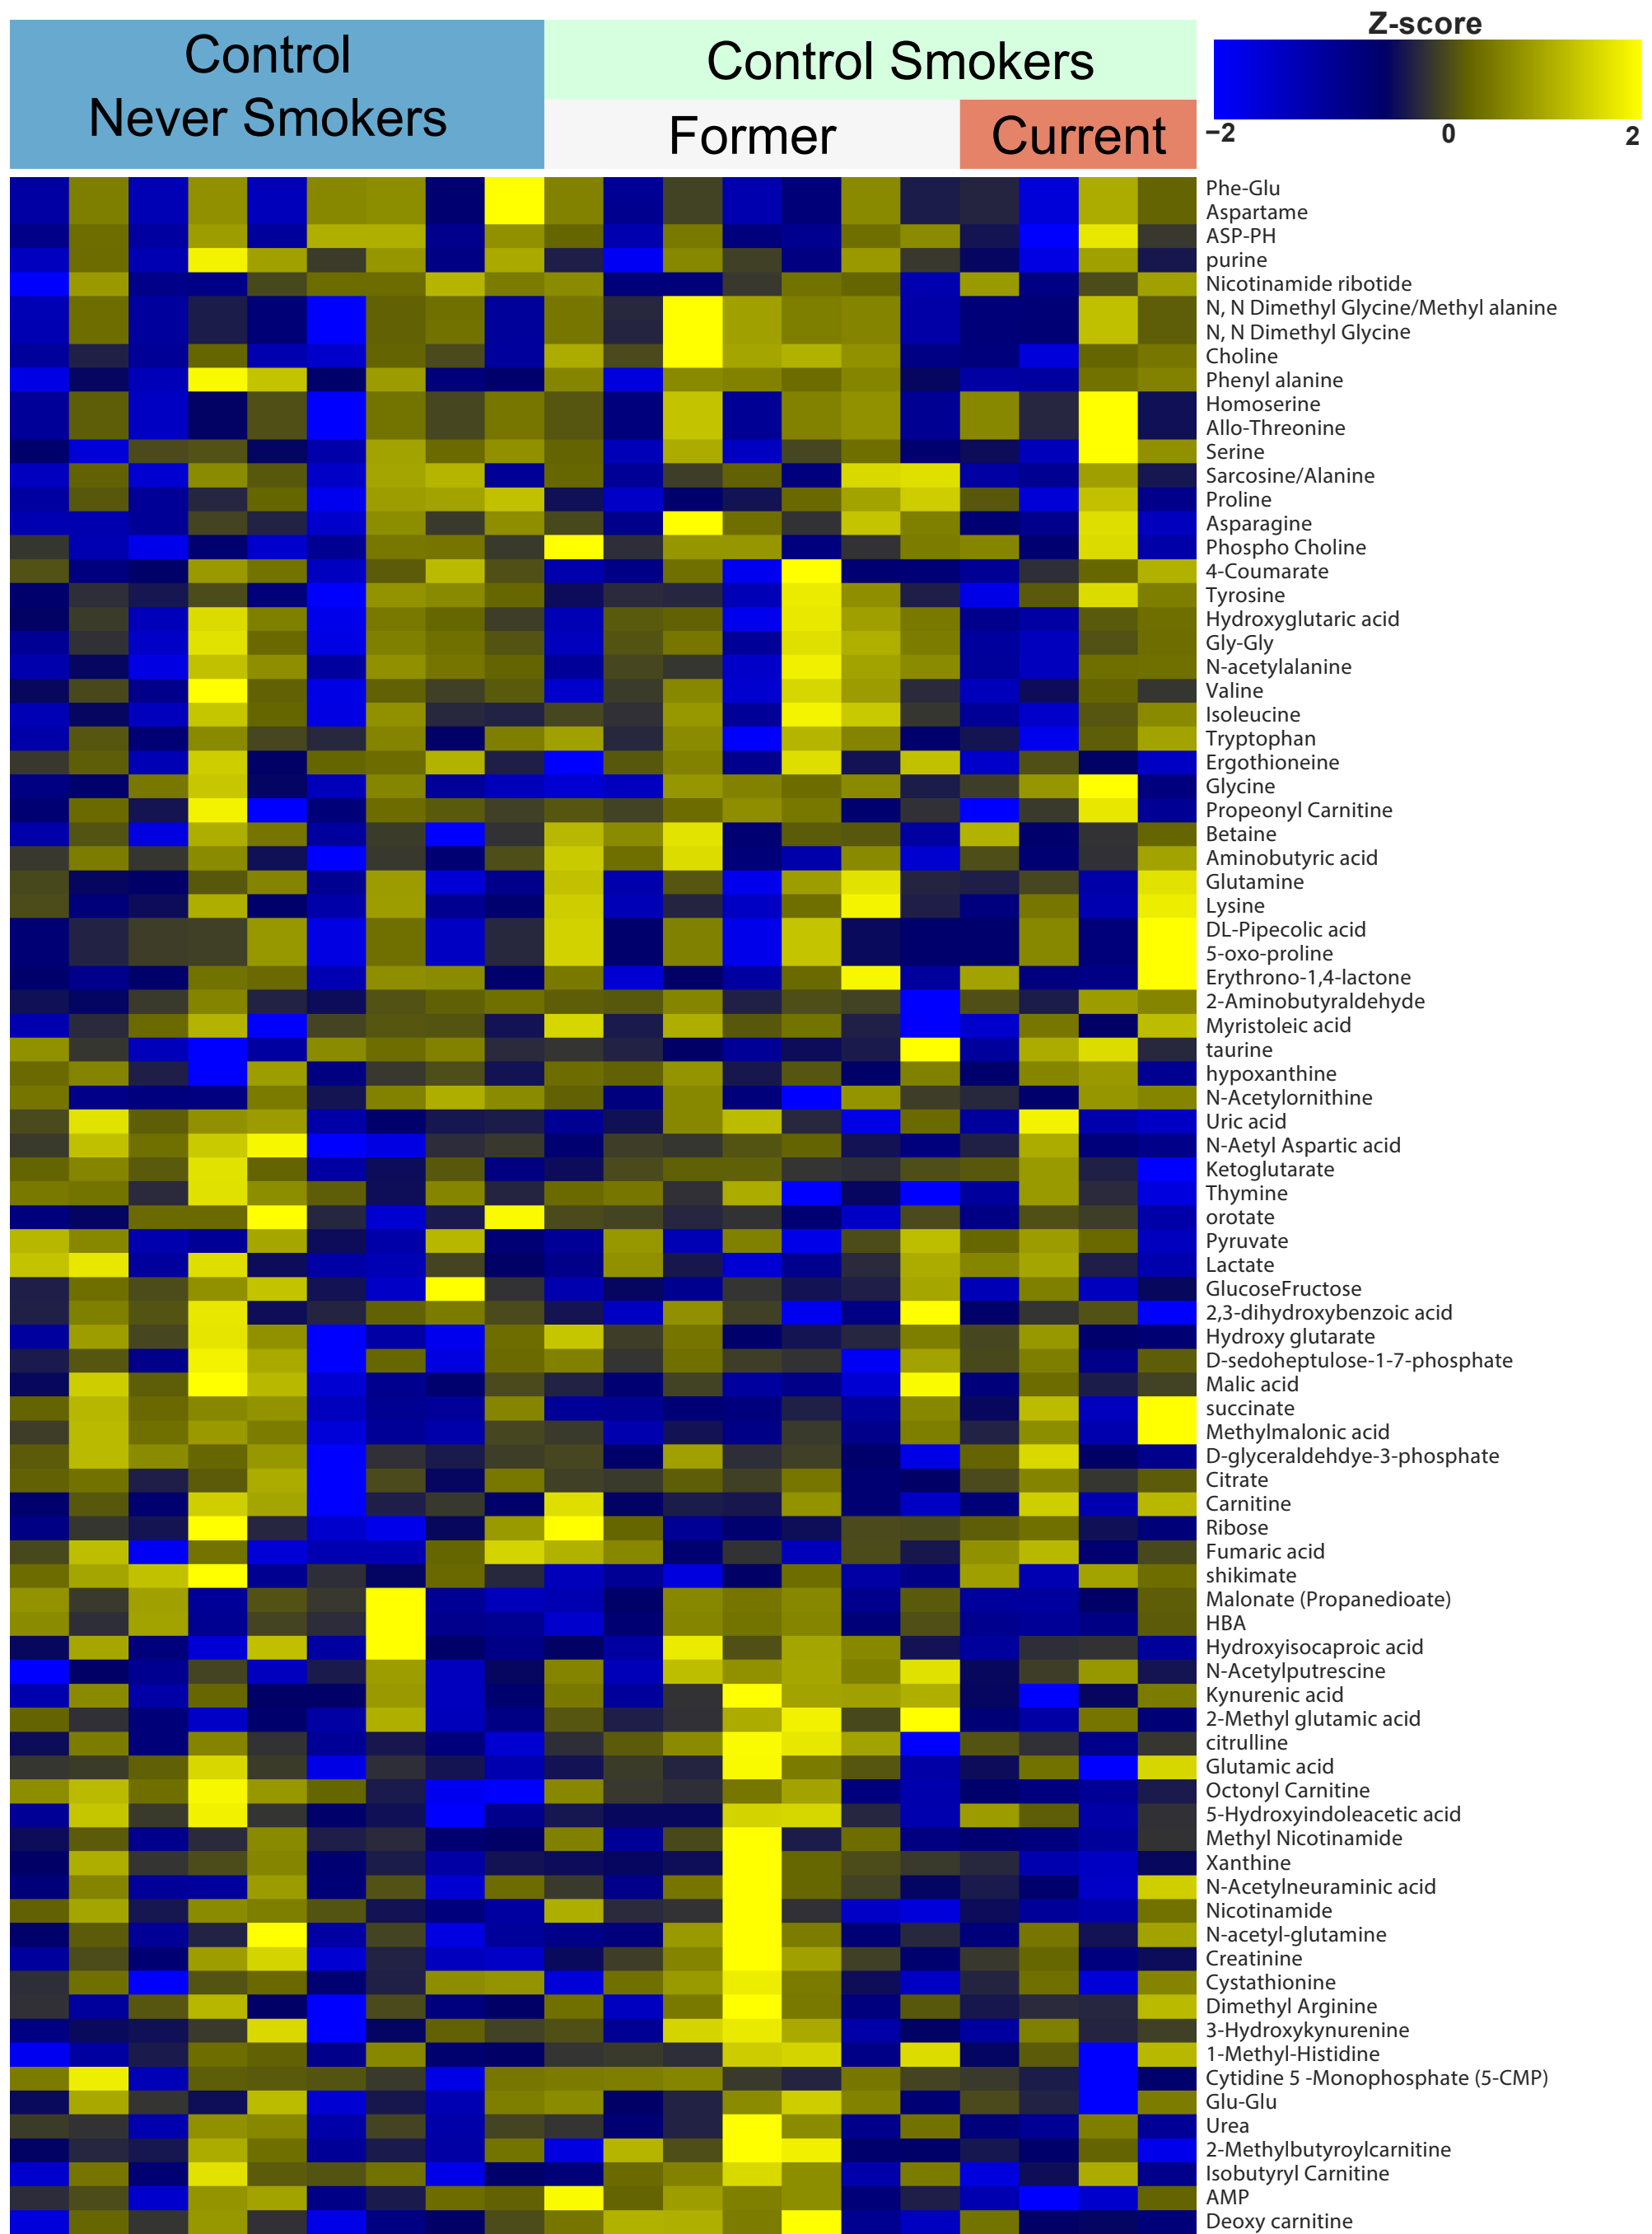

**Supplementary Figure 2.** Metabolite heat map in control never smokers and control smokers (FDR=<0.25).

Supplement: NIHMS1518034-supplement-2.pdf [file NIHMS1518034-supplement-2.pdf]
